# Supplementary material
Source: PubMed Central journal article supplement (PMC3971915)
Supplement: NIHMS577206-supplement-Supplemental_Digital_Content.pdf [file NIHMS577206-supplement-Supplemental_Digital_Content.pdf]

## Appendix

In addition to the authors, other members of the *Eunice Kennedy Shriver* National Institute of Child Health and Human Development (NICHD) Maternal-Fetal Medicine Units (MFMU) Network are as follows:

University of Pittsburgh, Pittsburgh, PA – S. Caritis, T. Kamon, M. Cotroneo, D. Fischer

University of Cincinnati, Cincinnati, OH – L. Myatt

University of Utah, Salt Lake City, UT – P. Reed, S. Quinn (LDS Hospital), V. Morby (McKay-Dee Hospital), F. Porter (LDS Hospital), R. Silver, J. Miller (Utah Valley Regional Medical Center), K. Hill

University of Alabama at Birmingham, Birmingham, AL – D.J. Rouse, A. Northen, P. Files, J. Grant, M. Wallace, K. Bailey

Columbia University, New York, NY – S. Bousleiman, R. Alcon, K. Saravia, F. Loffredo, A. Bayless (Christiana), C. Perez (St. Peter's University Hospital), M. Lake (St. Peter's University Hospital), M. Talucci

University of North Carolina at Chapel Hill, Chapel Hill, NC – K. Boggess, K. Dorman, J. Mitchell, K. Clark, S. Timlin

Case Western Reserve University-MetroHealth Medical Center, Cleveland, OH – J. Bailit, C. Milluzzi, W. Dalton, C. Brezine, D. Bazzo

University of Texas Southwestern Medical Center, Dallas, TX – K. Leveno, J. Sheffield, L. Moseley, M. Santillan, K. Buentipo, J. Price, L. Sherman, C. Melton, Y. Gloria-McCutchen, B. Espino

Northwestern University, Chicago, IL – M. Dinsmoor (Evanston NorthShore), T. Matson-Manning, G. Mallett

University of Texas Health Science Center at Houston, Houston, TX – S. Blackwell, K. Cannon, S. Lege-Humbert, Z. Spears

Brown University, Providence, RI – M.W. Carpenter, J. Tillinghast, M. Seebeck

The Ohio State University, Columbus, OH – J. Iams, F. Johnson, S. Fyffe, C. Latimer, S. Frantz, S. Wylie

Drexel University, Philadelphia, PA – M. Talucci, M. Hoffman (Christiana), J. Benson (Christiana), Z. Reid, C. Tocci

Wake Forest University Health Sciences, Winston-Salem, NC – P. Meis, M. Swain

Oregon Health & Science University, Portland, OR – W. Smith, L. Davis, E. Lairson, S. Butcher, S. Maxwell, D. Fisher

University of Texas Medical Branch, Galveston, TX – J. Moss, B. Stratton, G. Hankins, J. Brandon, C. Nelson-Becker, G. Olson, L. Pacheco

Wayne State University, Detroit, MI – G. Norman, S. Blackwell, P. Lockhart, D. Driscoll, M. Dombrowski

The George Washington University Biostatistics Center, Washington, DC – E. Thom, T. Boekhoudt, L. Leuchtenburg

National Heart, Lung, and Blood Institute, Bethesda, MD – G. Pearson, V. Pemberton, J. Cutler, W. Barouch

Eunice Kennedy Shriver National Institute of Child Health and Human Development, Bethesda, MD – S. Tolivaia

MFMU Steering Committee Chair (University of Texas Medical Center, Galveston, TX) – G.D. Anderson

Johnson J, Clifton RG, Roberts JM, Myatt L, Hauth JC, Spong CY, et al. Pregnancy outcomes with weight gain above or below the 2009 Institute of Medicine guidelines. *Obstet Gynecol* 2013;121.

The authors provided this information as a supplement to their article.

© Copyright 2013 American College of Obstetricians and Gynecologists.

Page 1 of 1
